# Supplementary material
Source: PubMed Central journal article supplement (PMC3061569)
Supplement: NIHMS263975-supplement-1_si_001.pdf [file NIHMS263975-supplement-1_si_001.pdf]

## SUPPORTING INFORMATION

CVD-based Binding Substrates for Spatially-resolved Analysis of Protein Binding by Imaging Ellipsometry

Aftin Ross<sup>†</sup>, Di Zhang<sup>Δ</sup>, Xiaopei Deng<sup>‡</sup>, Seiwon Laura Chang<sup>§</sup>, Joerg Lahann<sup>+,§,‡,†\*</sup>

Departments of Biomedical Engineering<sup>†</sup>, Chemical Engineering<sup>§</sup>, and Macromolecular Science and Engineering<sup>‡</sup>, University of Michigan, Ann Arbor, MI 48109, USA. Department of Biomedical Engineering<sup>Δ</sup>, Washington University in St. Louis, St. Louis, MO 63130, USA.

<sup>†</sup>Institute of Functional Interfaces, Karlsruhe Institute of Technology, Hermann-von-Helmholtz-Platz 1, 76344 Eggenstein-Leopoldshafen, Germany

This supporting information includes a description of the methods utilized to obtain information about the stability of the chemical vapor deposition film after 12 months storage as well as a figure depicting the chemical structure of the film at this time point.

One of the advantages of the CVD platform is the stability of the film. As such, film stability was assessed after storage in air for 12 months using Fourier transform infrared spectroscopy (FTIR). A Thermo Nicolet 6700 spectrometer (Walham, MA, USA) at an 85° grazing angle, 4cm<sup>-1</sup> resolution, and 128 scans was utilized to analyze the polymer structure. The supplementary figure below indicates characteristic carbonyl bands at ~1712 cm<sup>-1</sup> and reveals the C-F stretch at 1066, 1232, and 1352 cm<sup>-1</sup> indicating that film structure is maintained.

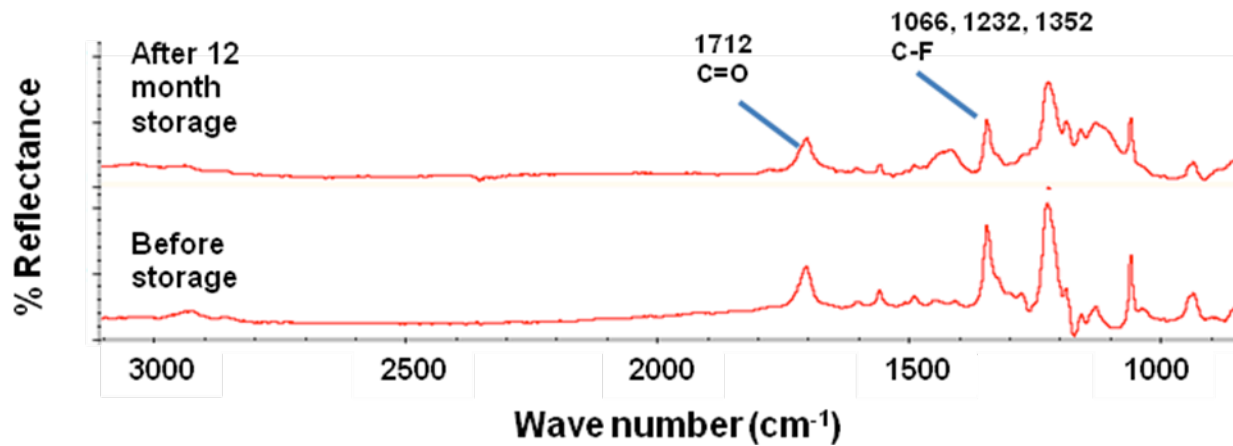

**Supplementary Figure 1.** The stability of the CVD film after storage in air for 12 months was confirmed by FTIR. Characteristic carbonyl and C-F stretches are apparent.
